# Supplementary material for: Contrasting nickel and zinc hyperaccumulation in subspecies of Dichapetalum gelonioides from Southeast Asia
Source: PubMed Central journal article supplement (PMC6018115; doi:10.1038/s41598-018-26859-7), 2018-06-25
Supplement: 41598_2018_26859_MOESM1_ESM.pdf [file 41598_2018_26859_MOESM1_ESM.pdf]

# **Contrasting nickel and zinc hyperaccumulation in subspecies of *Dichapetalum gelonioides* from Southeast Asia**

Philip Nti Nkrumah<sup>1</sup>, Guillaume Echevarria<sup>2</sup>, Peter D. Erskine<sup>1</sup> and Antony van der Ent<sup>1,2\*</sup>

<sup>1</sup>Centre for Mined Land Rehabilitation, Sustainable Minerals Institute, The University of Queensland, Queensland, Australia.

<sup>2</sup>Université de Lorraine-INRA, Laboratoire Sols et Environnement, UMR 1120, France.

\*corresponding author: [a.vanderent@uq.edu.au](mailto:a.vanderent@uq.edu.au)

**Supplementary Table 1.** X-ray Fluorescence Spectroscopy (XRF) concentration data (mg kg<sup>-1</sup>) of herbarium specimens in the genus *Dichapetalum* held at the Forest Research Centre Herbarium in Sepilok, Sabah, Malaysia. Abbreviations: <LOD is lower than limit of detection for XRF.

| Sample ID | Mn   | Co   | Ni    | Zn    | Genus               | Species            | Subspecies          | Date       | Locality     | Gazetteer         |
|-----------|------|------|-------|-------|---------------------|--------------------|---------------------|------------|--------------|-------------------|
| 36007     | 85   | <LOD | 31705 | 400   | <i>Dichapetalum</i> | <i>gelonioides</i> | <i>tuberculatum</i> | 27/05/1963 | Lahad Datu   | Silam             |
| 33353     | 140  | <LOD | 25930 | 265   | <i>Dichapetalum</i> | <i>gelonioides</i> | <i>tuberculatum</i> | 4/03/1963  | Lahad Datu   | Lahad Datu        |
| 36019     | 80   | <LOD | 24065 | 1150  | <i>Dichapetalum</i> | <i>gelonioides</i> | <i>tuberculatum</i> | 28/05/1963 | Lahad Datu   | Silam             |
| 57302     | <LOD | <LOD | 23595 | 285   | <i>Dichapetalum</i> | <i>gelonioides</i> | <i>tuberculatum</i> | 18/10/1966 | Lahad Datu   | Silam             |
| 57282     | 135  | <LOD | 17410 | 240   | <i>Dichapetalum</i> | <i>gelonioides</i> | <i>tuberculatum</i> | 16/10/1966 | Lahad Datu   | Silam             |
| 57302     | <LOD | <LOD | 14000 | 975   | <i>Dichapetalum</i> | <i>gelonioides</i> | <i>tuberculatum</i> | 18/10/1966 | Lahad Datu   | Silam             |
| SAN21684  | 120  | <LOD | 13210 | 635   | <i>Dichapetalum</i> | <i>gelonioides</i> | <i>tuberculatum</i> | 27/03/1961 | Lahad Datu   | Ulu Segama FR     |
| SAN68326  | <LOD | <LOD | 11775 | 85    | <i>Dichapetalum</i> | <i>gelonioides</i> | <i>tuberculatum</i> | 15/05/1970 | Lahad Datu   | Mostyn            |
| 46145     | 140  | <LOD | 10560 | 1370  | <i>Dichapetalum</i> | <i>gelonioides</i> | <i>tuberculatum</i> | 22/10/1965 | Lahad Datu   | Mostyn            |
| SAN96938  | <LOD | <LOD | 9710  | 220   | <i>Dichapetalum</i> | <i>gelonioides</i> | <i>tuberculatum</i> | 7/06/1983  | Beluran      | Telupid           |
| SAN117015 | 110  | <LOD | 8345  | 175   | <i>Dichapetalum</i> | <i>gelonioides</i> | <i>tuberculatum</i> | 24/01/1987 | Beluran      | Ulu Tungud FR     |
| SAN108912 | <LOD | <LOD | 6275  | 365   | <i>Dichapetalum</i> | <i>gelonioides</i> | <i>tuberculatum</i> | 8/07/1985  | Lahad Datu   | Ulu Segama FR     |
| SAN108694 | 100  | <LOD | 6140  | 110   | <i>Dichapetalum</i> | <i>gelonioides</i> | <i>tuberculatum</i> | 29/03/1985 | Lahad Datu   | Ulu Segama FR     |
| 36358     | 150  | 65   | 4570  | 1415  | <i>Dichapetalum</i> | <i>gelonioides</i> | <i>tuberculatum</i> | 9/07/1963  | Kinabatangan | Segaliud Lokan FR |
| 36392     | 95   | <LOD | 3460  | 1335  | <i>Dichapetalum</i> | <i>gelonioides</i> | <i>tuberculatum</i> | 12/07/1964 | Kinabatangan | Segaliud Lokan FR |
| SAN107849 | <LOD | <LOD | 2760  | 35    | <i>Dichapetalum</i> | <i>gelonioides</i> | <i>tuberculatum</i> | 10/03/1985 | Lahad Datu   | Ulu Segama FR     |
| SAN108913 | <LOD | <LOD | 2695  | 510   | <i>Dichapetalum</i> | <i>gelonioides</i> | <i>tuberculatum</i> | 9/07/1985  | Lahad Datu   | Ulu Segama FR     |
| 36389     | 75   | <LOD | 790   | 2665  | <i>Dichapetalum</i> | <i>gelonioides</i> | <i>tuberculatum</i> | 11/07/1963 | Kinabatangan | Segaliud Lokan FR |
| SAN74588  | 435  | <LOD | 105   | 915   | <i>Dichapetalum</i> | <i>gelonioides</i> | <i>pilosum</i>      | 10/12/1971 | Beluran      | Beluran           |
| SAN50532  | 1645 | <LOD | 60    | 4985  | <i>Dichapetalum</i> | <i>gelonioides</i> | <i>pilosum</i>      | 12/10/1966 | Tenom        | Tomani            |
| SAN28375  | 2890 | <LOD | <LOD  | 10610 | <i>Dichapetalum</i> | <i>gelonioides</i> | <i>pilosum</i>      | 21/11/1961 | Sandakan     | SepilokFR         |
| SAN71291  | 335  | <LOD | <LOD  | 10505 | <i>Dichapetalum</i> | <i>gelonioides</i> | <i>pilosum</i>      | 23/11/1970 | Beluran      | Segaliud Lokan FR |
| SAN31896  | 1305 | <LOD | <LOD  | 7280  | <i>Dichapetalum</i> | <i>gelonioides</i> | <i>pilosum</i>      | 17/11/1962 | Tenom        | Sapong            |
| 39637     | 1365 | <LOD | <LOD  | 6910  | <i>Dichapetalum</i> | <i>gelonioides</i> | <i>pilosum</i>      | 2/10/1963  | Sandakan     | Kebun Cina        |

**Supplementary Table 1. Cont.**

| <b>Sample ID</b> | <b>Mn</b> | <b>Co</b> | <b>Ni</b> | <b>Zn</b> | <b>Genus</b>        | <b>Species</b>     | <b>Subspecies</b>   | <b>Date</b> | <b>Locality</b> | <b>Gazetteer</b> |
|------------------|-----------|-----------|-----------|-----------|---------------------|--------------------|---------------------|-------------|-----------------|------------------|
| SAN139861        | 430       | <LOD      | <LOD      | 5915      | <i>Dichapetalum</i> | <i>gelonioides</i> | <i>pilosum</i>      | 21/11/1994  | Sandakan        | Sandakan         |
| SAN27736         | 1130      | <LOD      | <LOD      | 5870      | <i>Dichapetalum</i> | <i>gelonioides</i> | <i>pilosum</i>      | 10/10/1961  | Sandakan        | Sibuga           |
| SAN64733         | 2010      | <LOD      | <LOD      | 5550      | <i>Dichapetalum</i> | <i>gelonioides</i> | <i>pilosum</i>      | 8/05/1969   | Sandakan        | Sepilok FR       |
| 43605            | 1955      | <LOD      | <LOD      | 4645      | <i>Dichapetalum</i> | <i>gelonioides</i> | <i>pilosum</i>      | 5/05/1964   | Sandakan        | Sepilok FR       |
| SAN91827         | <LOD      | <LOD      | <LOD      | 4000      | <i>Dichapetalum</i> | <i>gelonioides</i> | <i>tuberculatum</i> | 24/04/1980  | Tawau           | Kalabakan FR     |
| 49206            | 730       | <LOD      | <LOD      | 3890      | <i>Dichapetalum</i> | <i>gelonioides</i> | <i>pilosum</i>      | 4/08/1965   | Ranau           | Ranau            |
| SAN128789        | 715       | <LOD      | <LOD      | 3860      | <i>Dichapetalum</i> | <i>gelonioides</i> | <i>pilosum</i>      | 15/05/1990  | Sandakan        | Sepilok FR       |
| SAN141427        | 2335      | <LOD      | <LOD      | 3550      | <i>Dichapetalum</i> | <i>gelonioides</i> | <i>pilosum</i>      | 7/10/1994   | Sandakan        | Kebun Cina       |
| SAN80879         | 345       | <LOD      | <LOD      | 3455      | <i>Dichapetalum</i> | <i>gelonioides</i> | <i>tuberculatum</i> | 17/06/1976  | Nabawan         | Pensiangan       |
| SAN95130         | 280       | <LOD      | <LOD      | 3320      | <i>Dichapetalum</i> | <i>gelonioides</i> | -                   | 30/03/1982  | Kinabatangan    | Tongod           |
| SAN101721        | 1055      | <LOD      | <LOD      | 3295      | <i>Dichapetalum</i> | <i>gelonioides</i> | <i>tuberculatum</i> | 21/09/1983  | Kinabatangan    | Tongod           |
| SAN90292         | 1210      | <LOD      | <LOD      | 3125      | <i>Dichapetalum</i> | <i>gelonioides</i> | <i>pilosum</i>      | 21/05/1982  | Sandakan        | Sepilok FR       |
| SAN85661         | 290       | <LOD      | <LOD      | 2785      | <i>Dichapetalum</i> | <i>gelonioides</i> | <i>tuberculatum</i> | 20/05/1977  | Keningau        | Crocker Range    |
| SAN132887        | 100       | <LOD      | <LOD      | 2755      | <i>Dichapetalum</i> | <i>gelonioides</i> | <i>tuberculatum</i> | 19/07/1991  | Sipitang        | Maligan FR       |
| SAN83679         | 255       | <LOD      | <LOD      | 2715      | <i>Dichapetalum</i> | <i>gelonioides</i> | -                   | 15/04/1977  | Sandakan        | Sepilok FR       |
| SAN79675         | <LOD      | <LOD      | <LOD      | 2595      | <i>Dichapetalum</i> | <i>gelonioides</i> | <i>tuberculatum</i> | 8/07/1974   | Tawau           | Tawau Hill FR    |
| SAN110948        | 1595      | <LOD      | <LOD      | 2520      | <i>Dichapetalum</i> | <i>gelonioides</i> | <i>pilosum</i>      | 19/03/1985  | Keningau        | Pingas Pingas    |
| SAN96594         | <LOD      | <LOD      | <LOD      | 2480      | <i>Dichapetalum</i> | <i>gelonioides</i> | <i>pilosum</i>      | 13/04/1983  | Ranau           | Ranau            |
| 54543            | <LOD      | <LOD      | <LOD      | 2335      | <i>Dichapetalum</i> | <i>gelonioides</i> | <i>tuberculatum</i> | 15/04/1966  | Lahad Datu      | Mostyn           |
| SAN117913        | 1345      | <LOD      | <LOD      | 2210      | <i>Dichapetalum</i> | <i>gelonioides</i> | <i>pilosum</i>      | 12/06/1987  | Ranau           | Bambangan        |
| SAN139563        | 655       | <LOD      | <LOD      | 2000      | <i>Dichapetalum</i> | <i>gelonioides</i> | <i>pilosum</i>      | 25/08/1994  | Nabawan         | Pensiangan       |
| SAN67455         | 145       | <LOD      | <LOD      | 1950      | <i>Dichapetalum</i> | <i>gelonioides</i> | <i>sumatranum</i>   | 5/02/1985   | Kinabatangan    | Tongod           |
| SAN119109        | 510       | <LOD      | <LOD      | 1950      | <i>Dichapetalum</i> | <i>gelonioides</i> | <i>pilosum</i>      | 22/09/1987  | Sandakan        | Kebun China      |
| SAN100189        | 155       | <LOD      | <LOD      | 1915      | <i>Dichapetalum</i> | <i>gelonioides</i> | <i>tuberculatum</i> | 12/09/1983  | Kinabatangan    | Tongod           |
| SAN118040        | 1215      | <LOD      | <LOD      | 1910      | <i>Dichapetalum</i> | <i>gelonioides</i> | <i>pilosum</i>      | 24/01/1989  | Sandakan        | Sepilok FR       |
| SAN111165        | 700       | <LOD      | <LOD      | 1850      | <i>Dichapetalum</i> | <i>gelonioides</i> | <i>pilosum</i>      | 17/10/1985  | Tawau           | Tawau Hill Park  |

**Supplementary Table 1. Cont.**

| <b>Sample ID</b> | <b>Mn</b> | <b>Co</b> | <b>Ni</b> | <b>Zn</b> | <b>Genus</b>        | <b>Species</b>      | <b>Subspecies</b>   | <b>Date</b> | <b>Locality</b> | <b>Gazetteer</b>        |
|------------------|-----------|-----------|-----------|-----------|---------------------|---------------------|---------------------|-------------|-----------------|-------------------------|
| SAN78183         | <LOD      | <LOD      | <LOD      | 1835      | <i>Dichapetalum</i> | <i>gelonioides</i>  | <i>pilosum</i>      | 18/06/1974  | Beaufort        | Bukau                   |
| SAN144517        | 200       | <LOD      | <LOD      | 1820      | <i>Dichapetalum</i> | <i>gelonioides</i>  | <i>pilosum</i>      | 6/02/2003   | Sandakan        | Sepilok FR              |
| 41188            | 745       | <LOD      | <LOD      | 1795      | <i>Dichapetalum</i> | <i>gelonioides</i>  | <i>pilosum</i>      | 6/02/1964   | Kota Belud      | Kelawat Forest Reserve  |
| SAN136788        | 285       | <LOD      | <LOD      | 1780      | <i>Dichapetalum</i> | <i>gelonioides</i>  | <i>pilosum</i>      | 18/01/1994  | Tenom           | Mandalom Forest Reserve |
| SAN83319         | 270       | <LOD      | <LOD      | 1675      | <i>Dichapetalum</i> | <i>gelonioides</i>  | <i>tuberculatum</i> | 20/05/1976  | Kinabatangan    | Lamag                   |
| SAN87350         | 435       | <LOD      | <LOD      | 1580      | <i>Dichapetalum</i> | <i>gelonioides</i>  | <i>pilosum</i>      | 19/08/1977  | Tawau           | Luasong                 |
| SAN78479         | 1095      | <LOD      | <LOD      | 1550      | <i>Dichapetalum</i> | <i>gelonioides</i>  | <i>pilosum</i>      | 7/03/1975   | Beaufort        | Gn. Lumaku FR           |
| SAN76238         | 650       | <LOD      | <LOD      | 1500      | <i>Dichapetalum</i> | <i>gelonioides</i>  | <i>pilosum</i>      | 25/09/1972  | Kota Belud      | Kota Belud              |
| SAN94824         | 150       | <LOD      | <LOD      | 1495      | <i>Dichapetalum</i> | <i>gelonioides</i>  | <i>tuberculatum</i> | 25/05/1982  | Tawau           | Kalabakan FR            |
| SAN95708         | 125       | <LOD      | <LOD      | 1480      | <i>Dichapetalum</i> | <i>gelonioides</i>  | <i>pilosum</i>      | 14/03/1983  | Tawau           | Kalabakan FR            |
| SAN116329        | 320       | <LOD      | <LOD      | 1400      | <i>Dichapetalum</i> | <i>gelonioides</i>  | <i>pilosum</i>      | 9/10/1986   | Ranau           | Mamut                   |
| SAN30146         | 170       | <LOD      | <LOD      | 1345      | <i>Dichapetalum</i> | <i>gelonioides</i>  | <i>pilosum</i>      | 27/05/1962  | Tawau           | Balung                  |
| SAN30688         | <LOD      | <LOD      | <LOD      | 1305      | <i>Dichapetalum</i> | <i>grandifolium</i> | -                   | 23/06/1962  | Sandakan        | Sandakan                |
| SAN90834         | 600       | <LOD      | <LOD      | 1235      | <i>Dichapetalum</i> | <i>gelonioides</i>  | <i>pilosum</i>      | 9/06/1979   | Tenom           | Tomani                  |
| SAN81046         | 2485      | <LOD      | <LOD      | 1175      | <i>Dichapetalum</i> | <i>gelonioides</i>  | <i>pilosum</i>      | 12/12/1974  | Ranau           | Tampias                 |
| SAN129925        | 295       | <LOD      | <LOD      | 1130      | <i>Dichapetalum</i> | <i>gelonioides</i>  | <i>pilosum</i>      | 15/05/1992  | Nabawan         | Milian Labau FR         |
| SAN118515        | 1555      | <LOD      | <LOD      | 1060      | <i>Dichapetalum</i> | <i>gelonioides</i>  | <i>pilosum</i>      | 27/10/1986  | Keningau        | Lanas                   |
| SAN124097        | 365       | <LOD      | <LOD      | 1055      | <i>Dichapetalum</i> | <i>gelonioides</i>  | <i>pilosum</i>      | 17/06/1988  | Tenom           | Mandalom                |
| SAN135212        | <LOD      | <LOD      | <LOD      | 920       | <i>Dichapetalum</i> | <i>gelonioides</i>  | <i>pilosum</i>      | 9/10/1996   | Tawau           | Kalumpang FR            |
| 39937            | 85        | <LOD      | <LOD      | 905       | <i>Dichapetalum</i> | <i>grandifolium</i> | -                   | 14/10/1963  | Lahad Datu      | Silabukan FR            |
| SAN25961         | <LOD      | <LOD      | <LOD      | 795       | <i>Dichapetalum</i> | <i>grandifolium</i> | -                   | 25/09/1961  | Lahad Datu      | Kalumpang FR            |

**Supplementary Table 1. Cont.**

| <b>Sample ID</b> | <b>Mn</b> | <b>Co</b> | <b>Ni</b> | <b>Zn</b> | <b>Genus</b>        | <b>Species</b>      | <b>Subspecies</b>   | <b>Date</b> | <b>Locality</b> | <b>Gazetteer</b>  |
|------------------|-----------|-----------|-----------|-----------|---------------------|---------------------|---------------------|-------------|-----------------|-------------------|
| SAN109934        | 400       | <LOD      | <LOD      | 785       | <i>Dichapetalum</i> | <i>gelonioides</i>  | <i>pilosum</i>      | 17/06/1985  | Keningau        | Keningau          |
| SAN143503        | 590       | <LOD      | <LOD      | 700       | <i>Dichapetalum</i> | <i>gelonioides</i>  | <i>pilosum</i>      | 23/06/2000  | Kunak           | Madai Baturong FR |
| 53053            | 0         | <LOD      | <LOD      | 645       | <i>Dichapetalum</i> | <i>grandifolium</i> | -                   | 8/02/1966   | Lahad Datu      | Lahad Datu        |
| SAN115873        | 195       | <LOD      | <LOD      | 600       | <i>Dichapetalum</i> | <i>gelonioides</i>  | <i>tuberculatum</i> | 28/05/1986  | Nabawan         | Nabawan           |
| 54898            | <LOD      | <LOD      | <LOD      | 570       | <i>Dichapetalum</i> | <i>grandifolium</i> | -                   | 14/07/1966  | Lahad Datu      | Lahad Datu        |
| SAN100282        | 135       | <LOD      | <LOD      | 445       | <i>Dichapetalum</i> | <i>gelonioides</i>  | <i>pilosum</i>      | 27/08/1984  | Kinabatangan    | Sg. Pinangah FR   |
| SAN135742        | 485       | <LOD      | <LOD      | 440       | <i>Dichapetalum</i> | <i>gelonioides</i>  | <i>pilosum</i>      | 22/07/1993  | Kinabatangan    | Penangah FR       |
| 39999            | 75        | <LOD      | <LOD      | 395       | <i>Dichapetalum</i> | <i>grandifolium</i> | --                  | 10/11/1963  | Lahad Datu      | Diwata            |
| SAN114479        | 425       | <LOD      | <LOD      | 380       | <i>Dichapetalum</i> | <i>gelonioides</i>  | <i>pilosum</i>      | 1/07/1986   | Nabawan         | Sapulut           |
| SAN20446         | <LOD      | <LOD      | <LOD      | 350       | <i>Dichapetalum</i> | <i>grandifolium</i> |                     | 18/11/1959  | Lahad Datu      | Mostyn            |
| SAN127666        | 210       | <LOD      | <LOD      | 265       | <i>Dichapetalum</i> | <i>gelonioides</i>  | <i>pilosum</i>      | 23/06/1989  | Nabawan         | Bkt. Pisagan      |
| SAN124509        | 0         | <LOD      | <LOD      | 250       | <i>Dichapetalum</i> | <i>grandifolium</i> | -                   | 13/10/1988  | Beluran         | Segaliud Lokan    |
| 40243            | 1065      | <LOD      | <LOD      | 165       | <i>Dichapetalum</i> | <i>gelonioides</i>  | <i>pilosum</i>      | 22/06/1964  | Beaufort        | Beaufort          |
| SAN79139         | <LOD      | <LOD      | <LOD      | 125       | <i>Dichapetalum</i> | <i>grandifolium</i> | -                   | 18/08/1975  | Tawau           | Tawau             |
| SAN95551         | <LOD      | <LOD      | <LOD      | 90        | <i>Dichapetalum</i> | <i>grandifolium</i> | -                   | 10/12/1982  | Tawau           | Kalabakan FR      |
| SAN124254        | <LOD      | <LOD      | <LOD      | 45        | <i>Dichapetalum</i> | <i>grandifolium</i> |                     | 19/07/1988  | Beluran         | Telupid           |
| SAN135148        | 450       | <LOD      | <LOD      | 10        | <i>Dichapetalum</i> | <i>gelonioides</i>  | <i>pilosum</i>      | 23/06/1996  | Kinabatangan    | Tangkulap VJR     |

**Supplementary Table 2a.** Certified Reference Materials (Apple Leaves NIST 1515) (values are given in  $\mu\text{g g}^{-1}$ ).

| <b>Replicate</b>                                          | <b>Ca</b>    | <b>Co</b>  | <b>Cr</b>  | <b>Fe</b>  | <b>K</b>     | <b>Mg</b>   | <b>Mn</b>  | <b>Ni</b>  | <b>P</b>    | <b>Zn</b>   |
|-----------------------------------------------------------|--------------|------------|------------|------------|--------------|-------------|------------|------------|-------------|-------------|
| 1                                                         | 15099        | 1.1        | 1.4        | 92         | 15997        | 2834        | 52         | 3.1        | 1399        | 20          |
| 2                                                         | 15339        | 0.7        | 1.1        | 83         | 16182        | 2901        | 58         | 3.7        | 1485        | 20          |
| 3                                                         | 15110        | 1.4        | 1.9        | 83         | 16026        | 2793        | 56         | 4.1        | 1506        | 18          |
| 4                                                         | 15303        | 0.5        | 0.8        | 87         | 15990        | 2937        | 51         | 3.2        | 1573        | 19          |
| 5                                                         | 15248        | 0.5        | 1.2        | 79         | 16231        | 2984        | 53         | 2.2        | 1434        | 16          |
| 6                                                         | 13288        | 0.2        | 0.3        | 50         | 14326        | 2390        | 45         | 1.2        | 1431        | 12          |
| 7                                                         | 13741        | 0.2        | 2.7        | 56         | 15135        | 2565        | 47         | 0.6        | 1463        | 17          |
| 8                                                         | 15012        | 6.4        | 0.9        | 73         | 15844        | 2667        | 56         | 1.5        | 1541        | 14          |
| 9                                                         | 14930        | 5.5        | 2.2        | 73         | 15771        | 2648        | 53         | 1.4        | 1586        | 13          |
| mean                                                      | <b>14785</b> | <b>1.8</b> | <b>1.3</b> | <b>75</b>  | <b>15722</b> | <b>2746</b> | <b>52</b>  | <b>2.3</b> | <b>1490</b> | <b>16.5</b> |
| stdev                                                     | <b>245</b>   | <b>0.7</b> | <b>0.2</b> | <b>4.5</b> | <b>204</b>   | <b>64</b>   | <b>1.4</b> | <b>0.4</b> | <b>20</b>   | <b>1.0</b>  |
| <b>Standard Reference Material Apple Leaves NIST 1515</b> |              |            |            |            |              |             |            |            |             |             |
| Certified values                                          | 15260        | 0.1        | 0.3        | 83         | 1610         | 2710        | 54         | 0.9        | 1590        | 13          |

*Notes: the in-house method diverted from the NIST-method as samples were not dehydrated prior to analysis, and digests were not treated with HF to dissolve remaining silicates.*

**Supplementary Table 2b.** Certified Reference Materials (Tomato Leaves NIST 1573a and Spinach Leaves NIST 1570a) (values are given in  $\mu\text{g g}^{-1}$ ).

| <b>Sample</b>                                         | <b>Ca</b> | <b>Cr</b> | <b>Fe</b> | <b>K</b> | <b>Mg</b> | <b>Mn</b> | <b>Ni</b> | <b>P</b> | <b>Zn</b> |
|-------------------------------------------------------|-----------|-----------|-----------|----------|-----------|-----------|-----------|----------|-----------|
| NIST 1573a                                            | 5038      | 2.1       | 356       | 2719     | 1135      | 242       | 1.6       | 2114     | 29        |
| NIST 1570a                                            | 1514      | 2.0       | 216       | 2910     | 863       | 82        | 2.5       | 5185     | 81        |
| <b>Standard Reference Material (Certified values)</b> |           |           |           |          |           |           |           |          |           |
| NIST 1573a                                            | 5050      | 2.0       | 368       | 2700     | 1200      | 246       | 1.59      | 2160     | 31        |
| NIST 1570a                                            | 1520      | –         | –         | 2900     | 890       | 76        | 2.14      | 5200     | 82        |

*NIST 1573a: Standard Reference Material Tomato Leaves*

*NIST 1570a: Standard Reference Material Spinach Leaves*

*Notes: the in-house method diverted from the NIST-method as samples were not dehydrated prior to analysis, and digests were not treated with HF to dissolve remaining silicates.*
